# Supplementary material
Source: PubMed Central journal article supplement (PMC8804152)
Supplement: 13311_2021_1140_MOESM2_ESM.pdf [file 13311_2021_1140_MOESM2_ESM.pdf]

The full content of this file cannot be displayed with your current PDF viewer. Please update to the latest possible version to view this document.
